# Supplementary figures and images for: Transient transcriptional silencing alters the cell cycle to promote germline stem cell differentiation in Drosophila
Source: PubMed Central journal article supplement — Dev Biol. Author manuscript; Available in PMC 2018 Feb 28. (PMC5830152; doi:10.1016/j.ydbio.2017.11.014), 2017-12-01

Figure S1

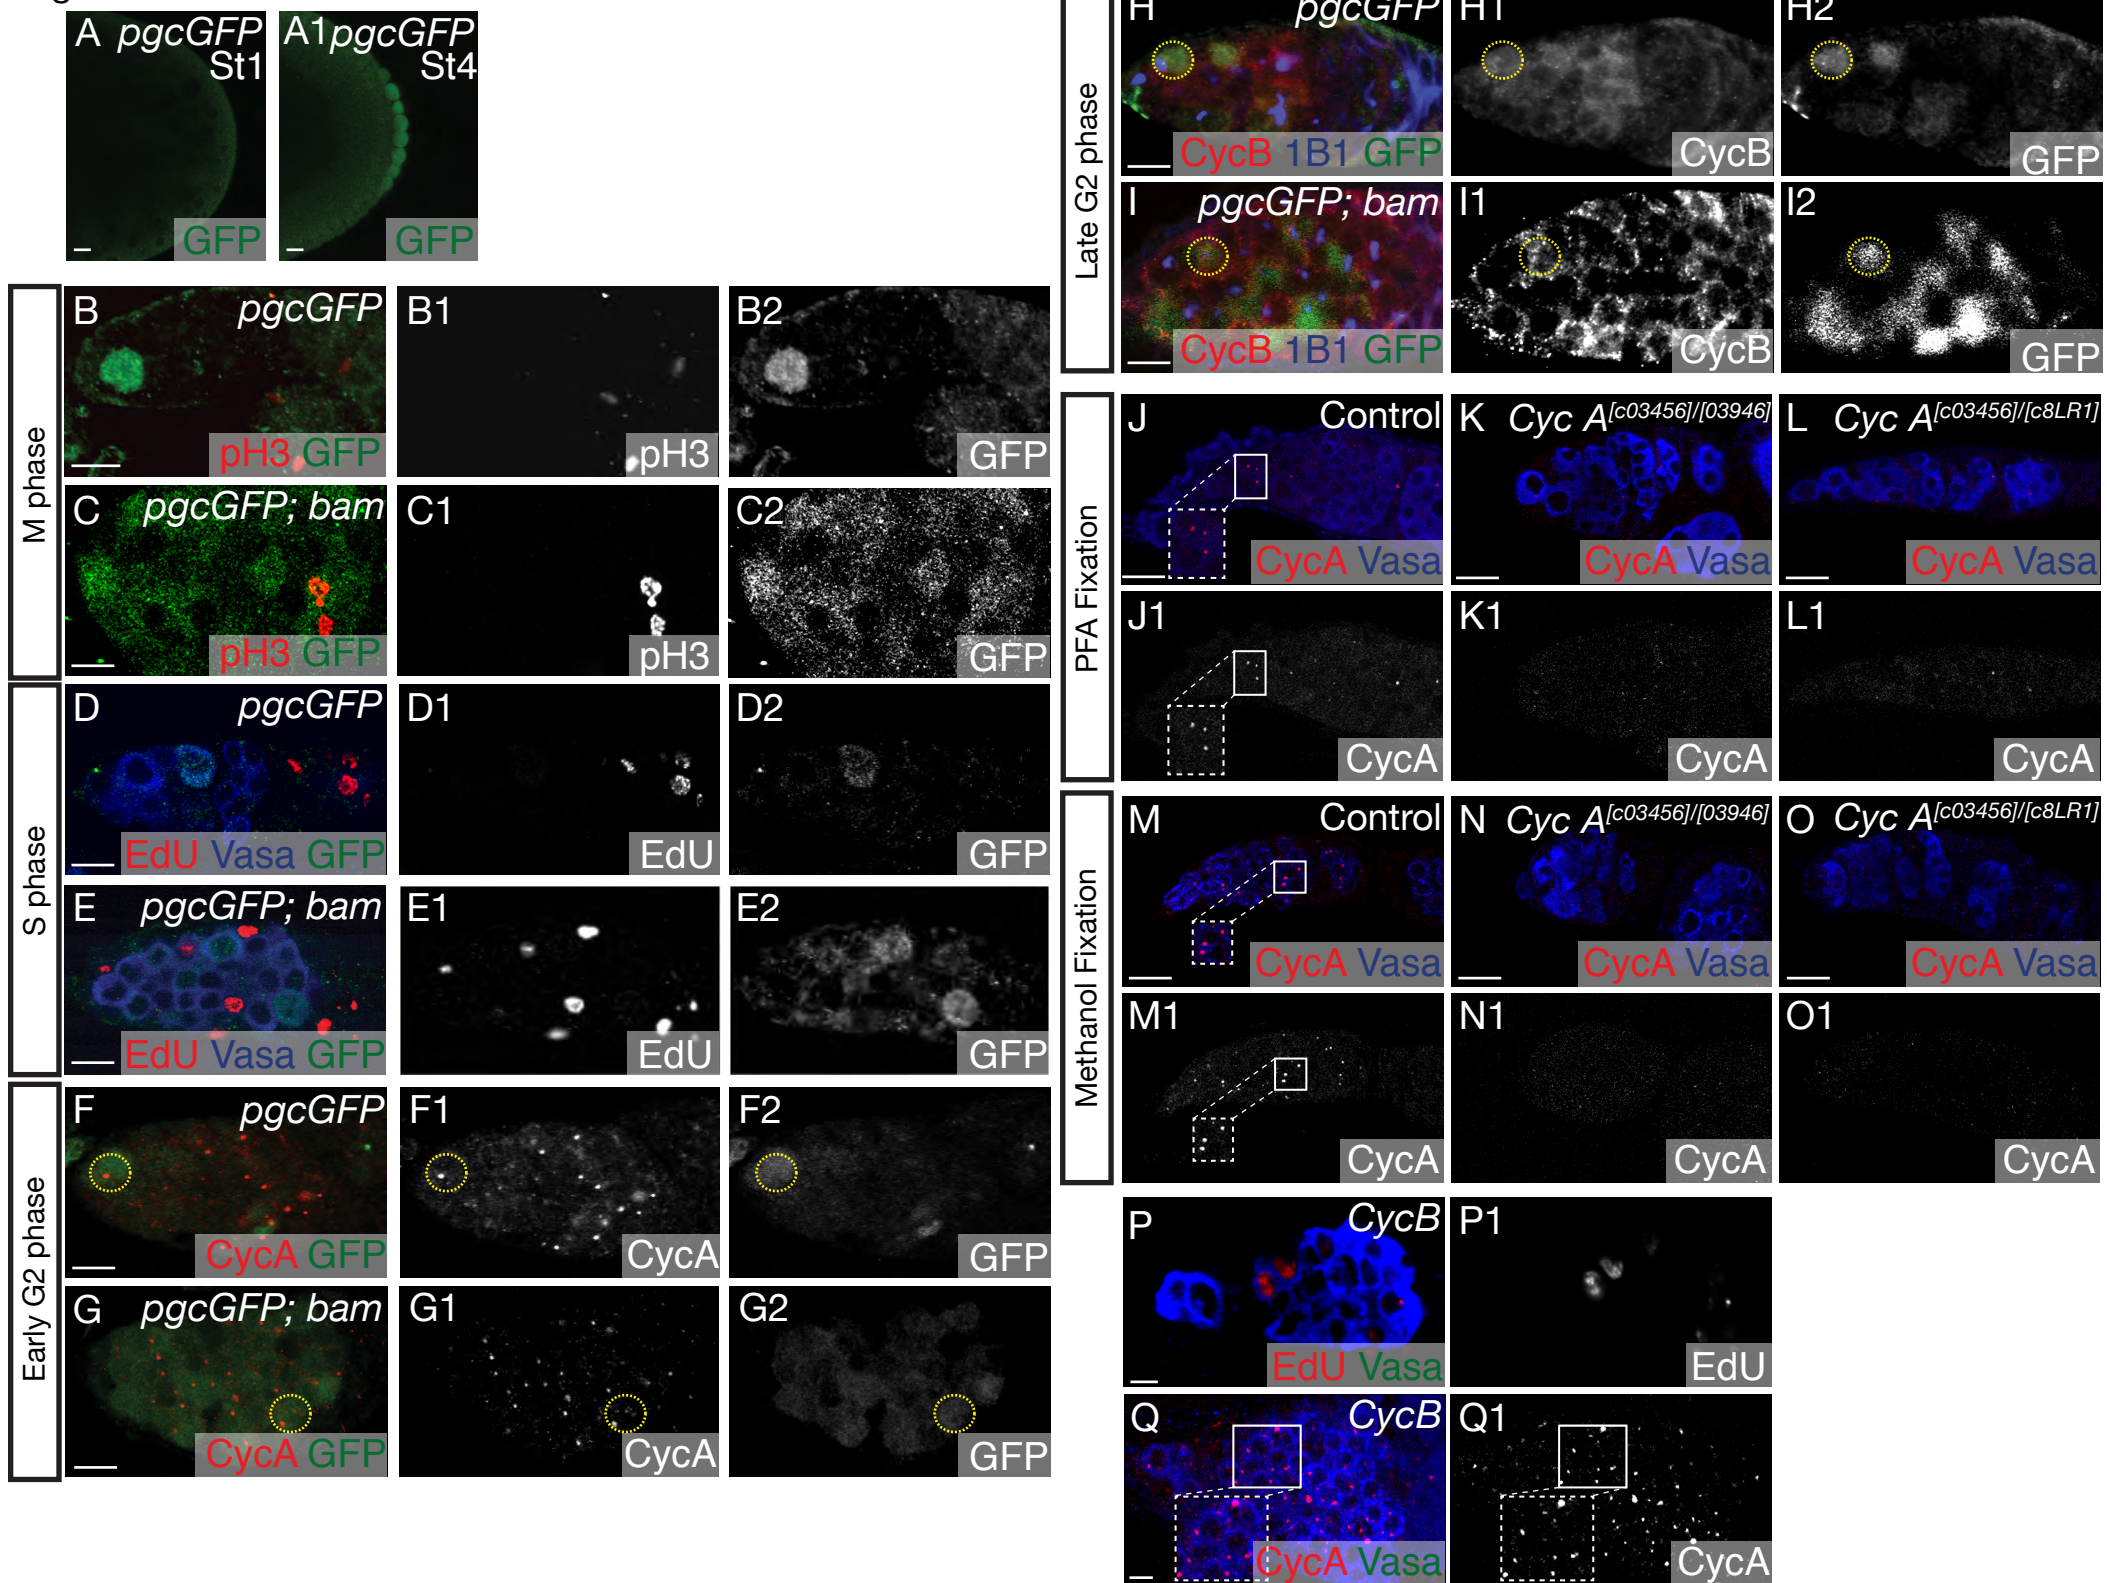

Supplement: NIHMS944545-supplement-1.pdf [file NIHMS944545-supplement-1.pdf]

Figure S2

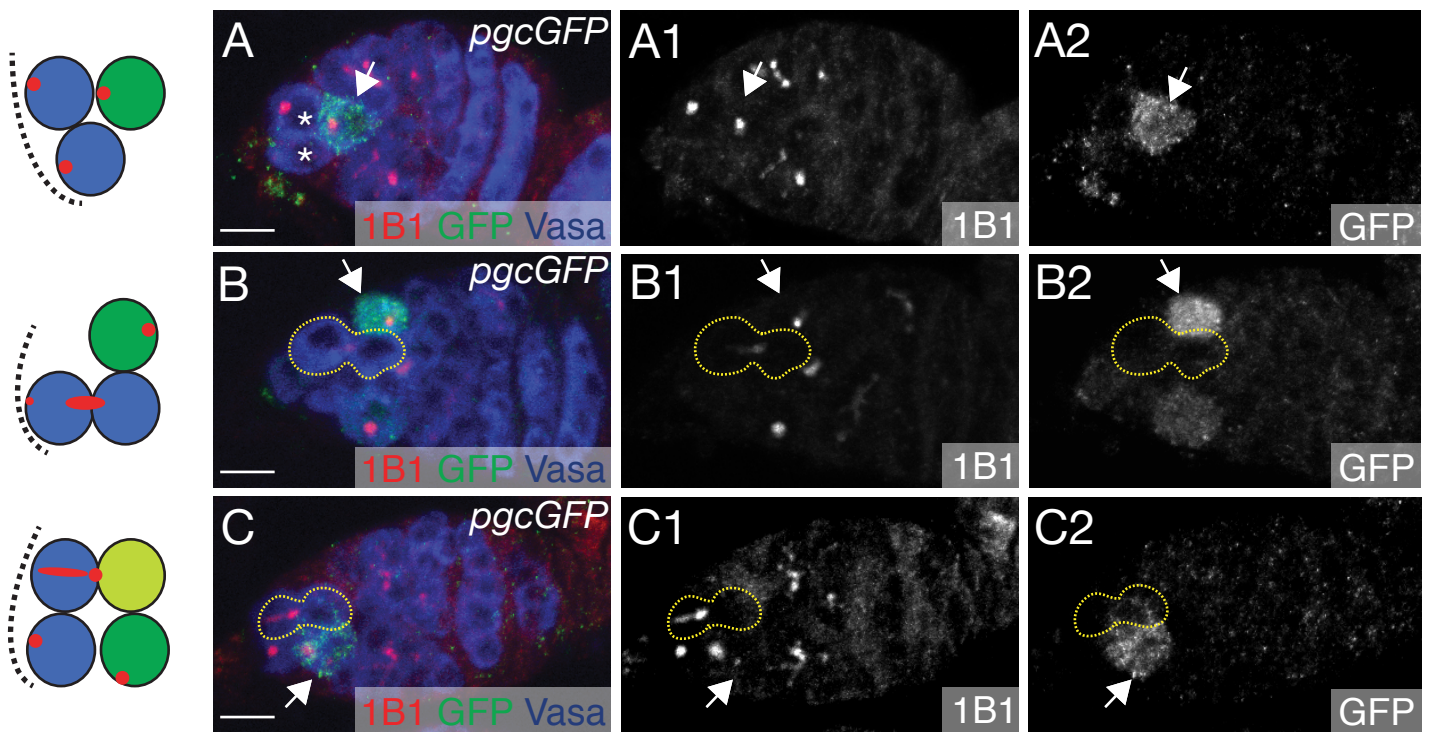

Supplement: NIHMS944545-supplement-2.pdf [file NIHMS944545-supplement-2.pdf]

Figure S3

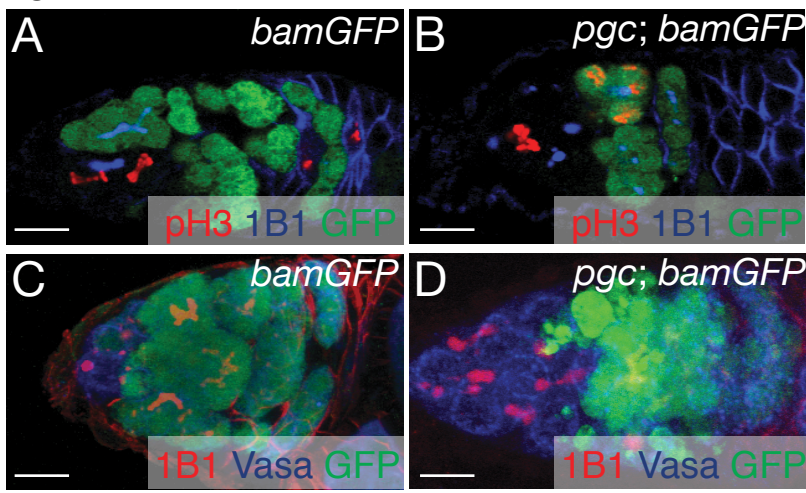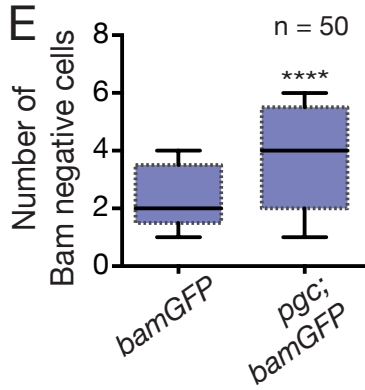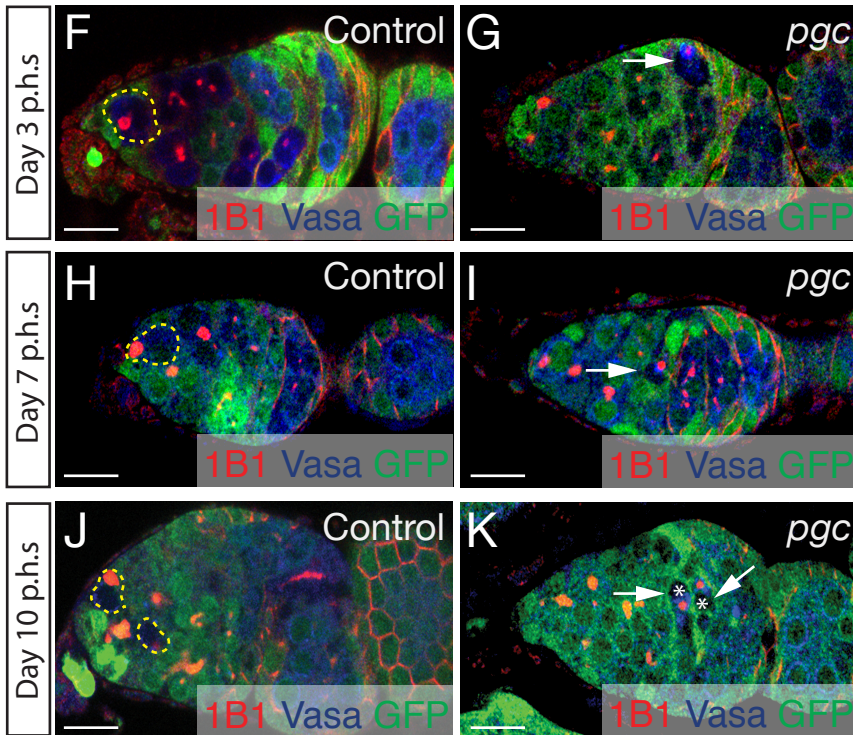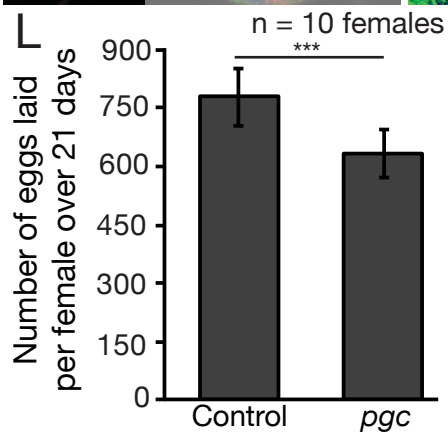

Supplement: NIHMS944545-supplement-3.pdf [file NIHMS944545-supplement-3.pdf]

Figure S4

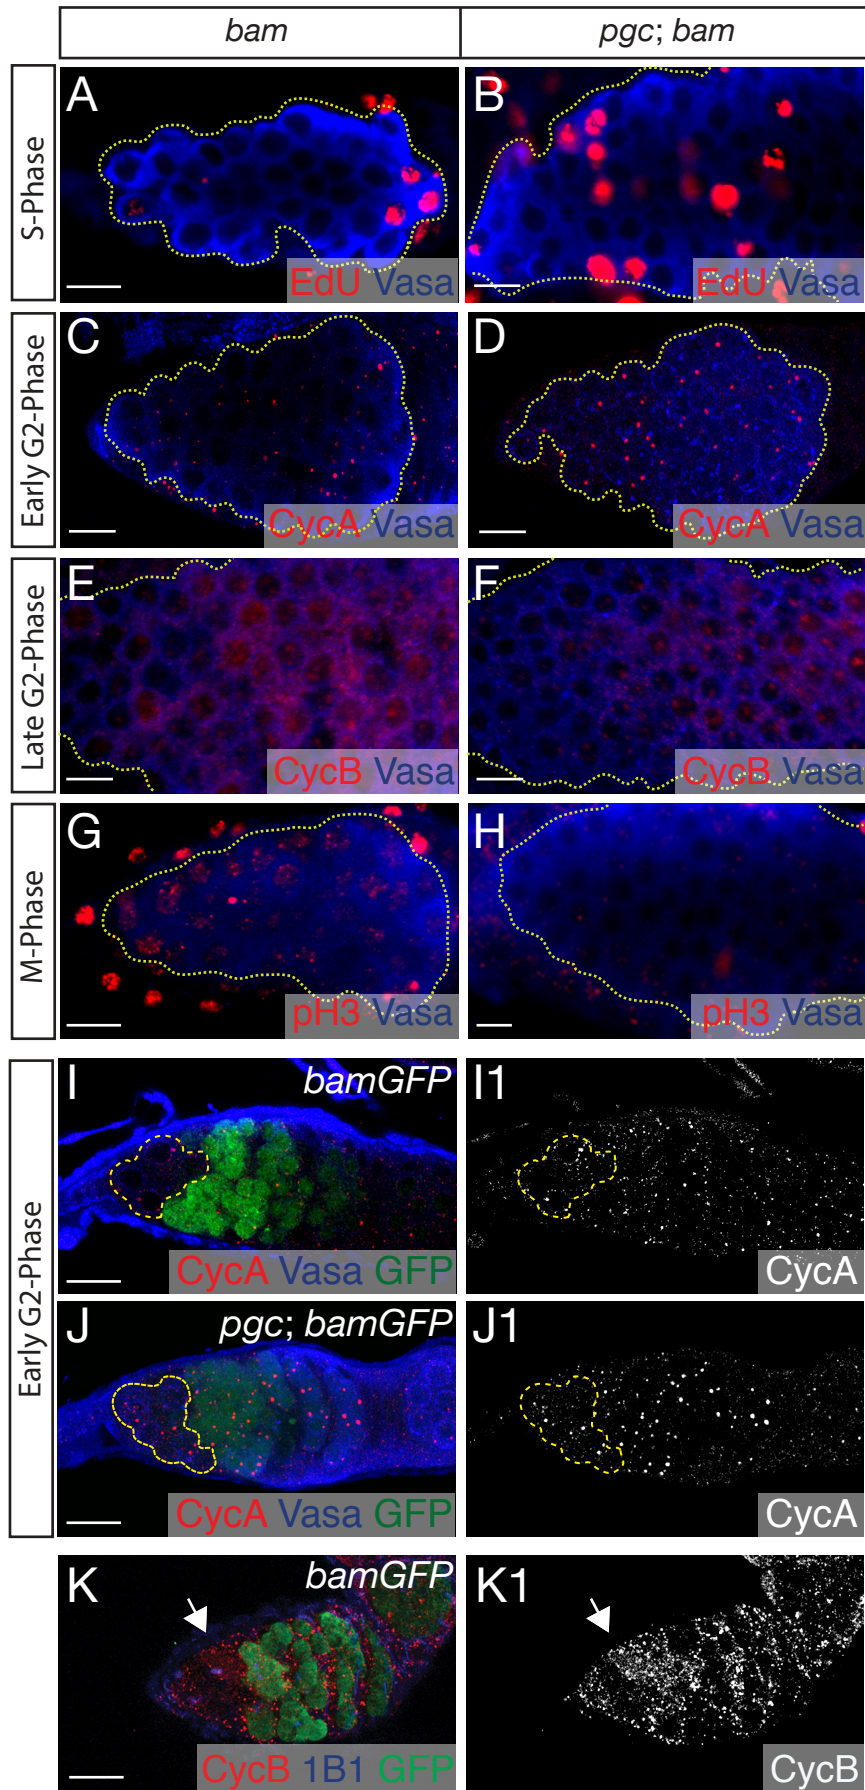

Supplement: NIHMS944545-supplement-4.pdf [file NIHMS944545-supplement-4.pdf]

Figure S5

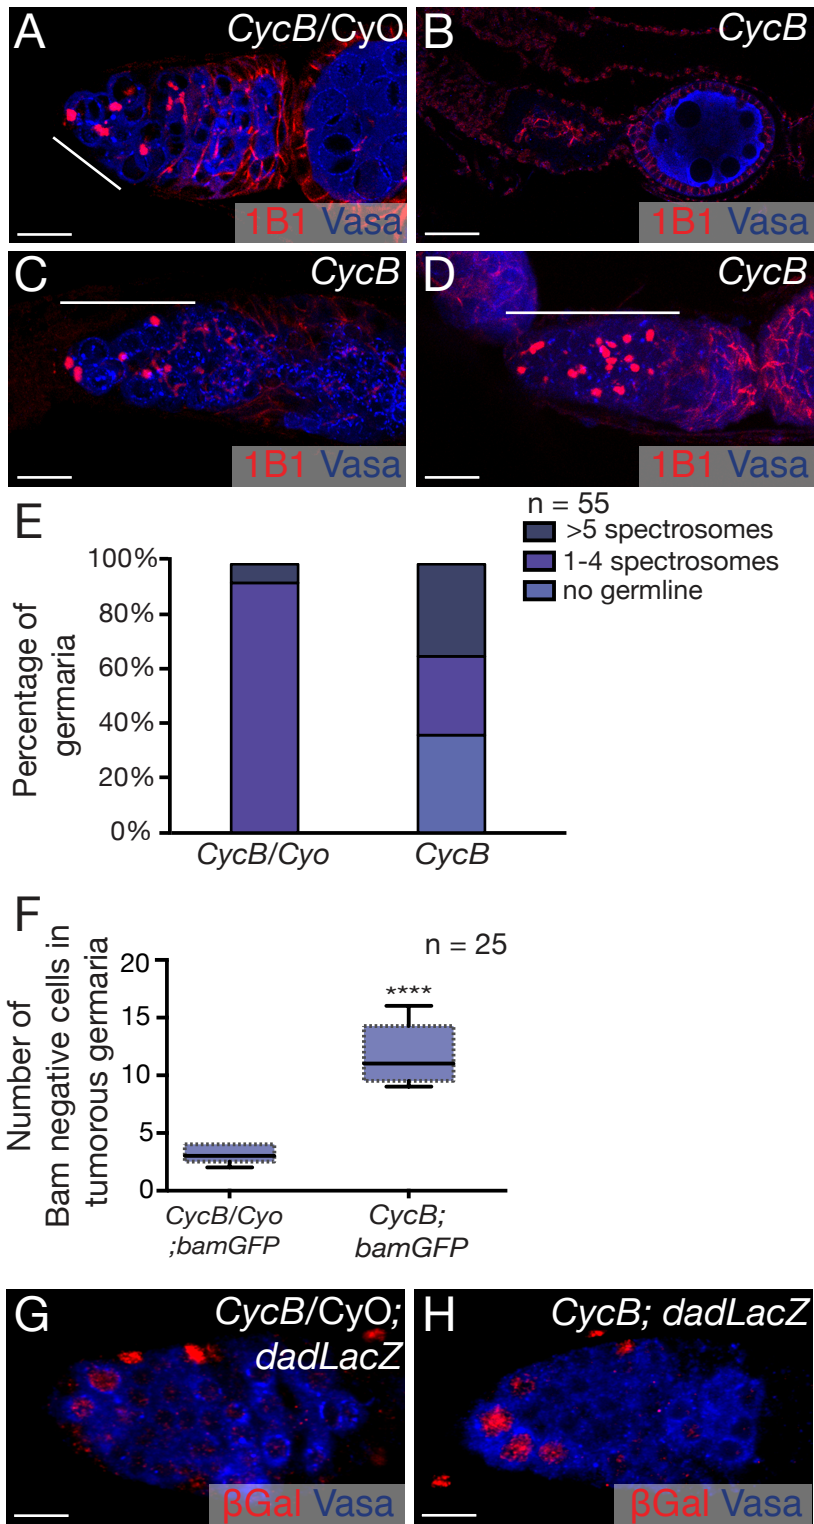

Supplement: NIHMS944545-supplement-5.pdf [file NIHMS944545-supplement-5.pdf]

Figure S6

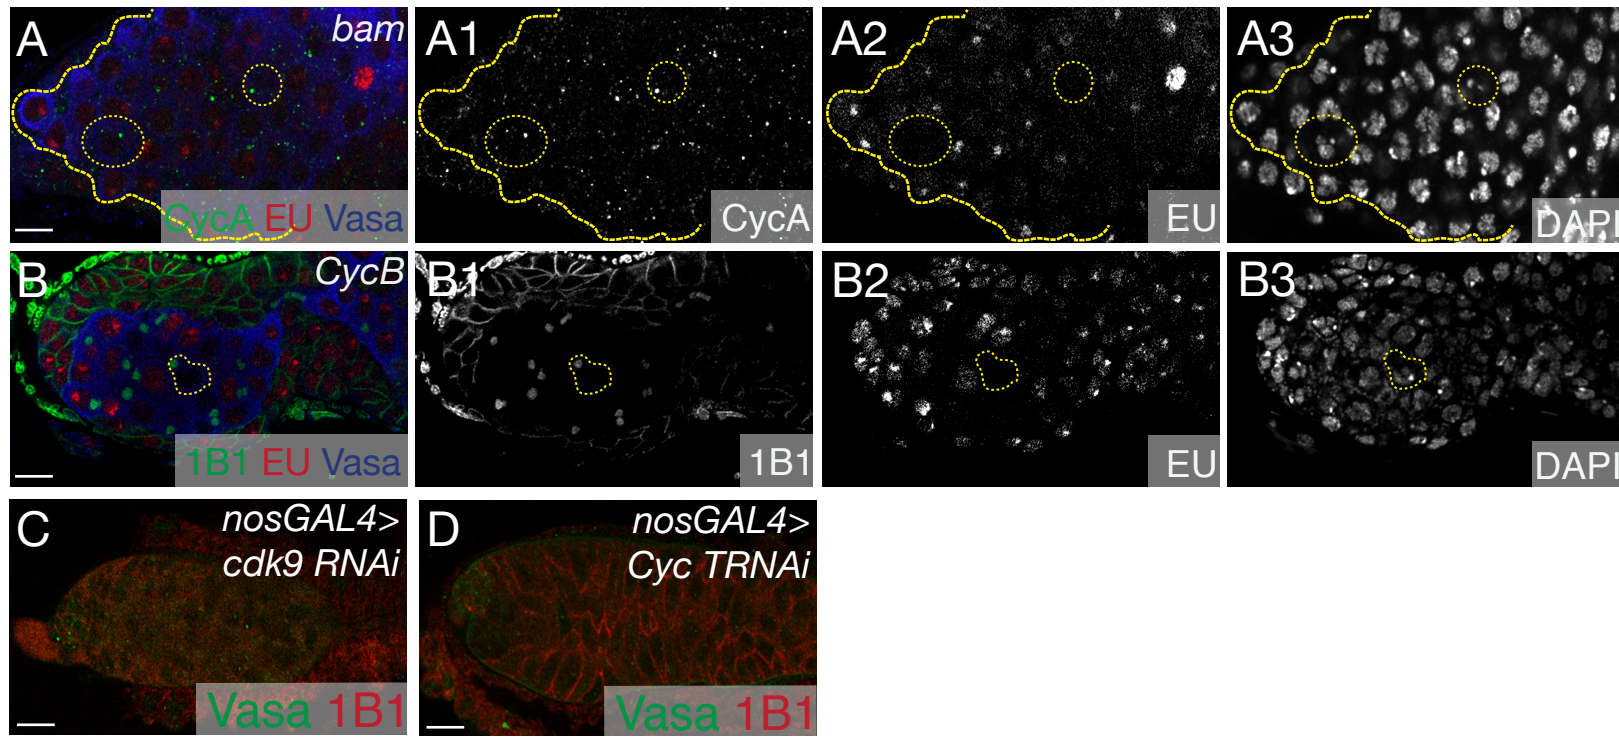

Supplement: NIHMS944545-supplement-6.pdf [file NIHMS944545-supplement-6.pdf]

Figure S7

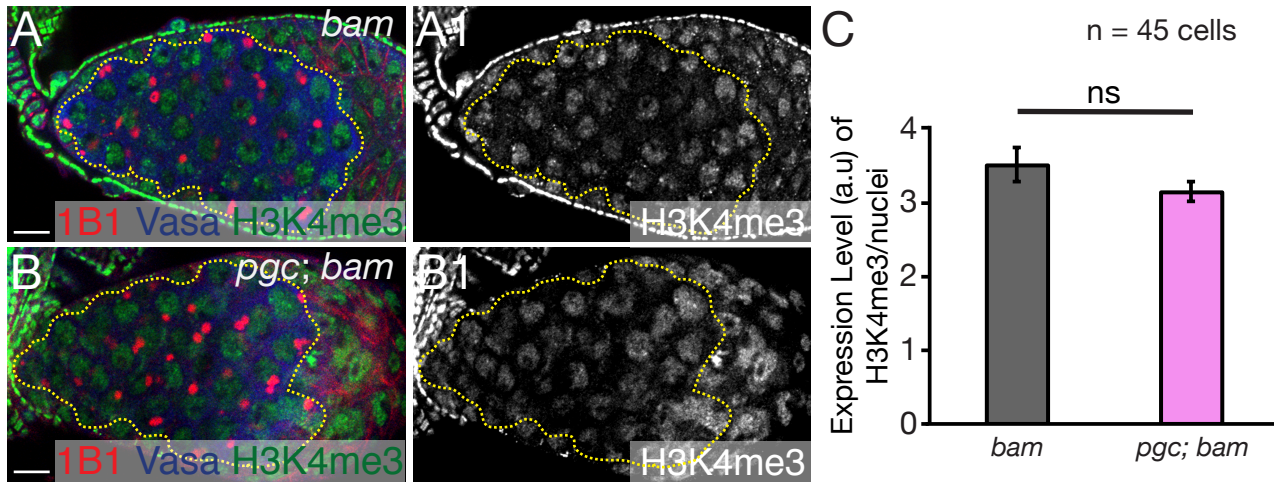

Supplement: NIHMS944545-supplement-7.pdf [file NIHMS944545-supplement-7.pdf]
